# Supplementary material
Source: PubMed Central journal article supplement (PMC5125846)
Supplement: NIHMS805851-supplement-Supp_info.pdf [file NIHMS805851-supplement-Supp_info.pdf]

Supplemental Table 1a: Safety variable (pQCT) at randomization.

| <b>Covariate</b>                | <b>Overall<br/>(N=30)</b> | <b>Placebo<br/>(N=14)</b> | <b>Topiramate<br/>(N=16)</b> |
|---------------------------------|---------------------------|---------------------------|------------------------------|
| <b>PQCT*</b>                    |                           |                           |                              |
| Radius (4%) Trabecular vBMD     | 254 (28.6) <sup>11</sup>  | 255 (24.4) <sup>4</sup>   | 252 (34.2) <sup>7</sup>      |
| Radius (4%) Trabecular CSA      | 240 (62.3) <sup>11</sup>  | 259 (42.0) <sup>4</sup>   | 218 (75.8) <sup>7</sup>      |
| Radius (4%) BSI                 | 39.9 (12.8) <sup>11</sup> | 42.2 (12.4) <sup>4</sup>  | 37.2 (13.5) <sup>7</sup>     |
| Radius (33%) Cortical vBMD      | 1142 (40.8) <sup>13</sup> | 1149 (42.7) <sup>5</sup>  | 1135 (40.2) <sup>8</sup>     |
| Radius (33%) Cortical CSA       | 84.1 (12.6) <sup>13</sup> | 90.3 (13.3) <sup>5</sup>  | 77.2 (7.7) <sup>8</sup>      |
| Radius (33%) Cortical thickness | 3.1 (0.31) <sup>13</sup>  | 3.2 (0.36) <sup>5</sup>   | 3.0 (0.19) <sup>8</sup>      |
| Radius (33%) Zp                 | 271 (64.6) <sup>13</sup>  | 300 (67.9) <sup>5</sup>   | 239 (45.3) <sup>8</sup>      |
| Radius (33%) SSI                | 236 (59.5) <sup>13</sup>  | 264 (59.6) <sup>5</sup>   | 205 (44.0) <sup>8</sup>      |
| Tibia (4%) Trabecular vBMD      | 270 (31.6) <sup>9</sup>   | 276 (37.1) <sup>4</sup>   | 266 (26.6) <sup>5</sup>      |
| Tibia (4%) Trabecular CSA       | 823 (176.5) <sup>9</sup>  | 824 (80.6) <sup>4</sup>   | 823 (237.6) <sup>5</sup>     |
| Tibia (4%) BSI                  | 124 (31.2) <sup>9</sup>   | 127 (30.9) <sup>4</sup>   | 122 (32.8) <sup>5</sup>      |
| Tibia (50%) Cortical vBMD       | 1114 (31.4) <sup>9</sup>  | 1113 (33.3) <sup>4</sup>  | 1114 (31.2) <sup>5</sup>     |
| Tibia (50%) Cortical CSA        | 341 (59.0) <sup>9</sup>   | 351 (52.7) <sup>4</sup>   | 331 (65.3) <sup>5</sup>      |
| Tibia (50%) Cortical thickness  | 5.4 (0.81) <sup>9</sup>   | 5.4 (0.78) <sup>4</sup>   | 5.3 (0.88) <sup>5</sup>      |
| Tibia (50%) Zp                  | 2610 (522.1) <sup>9</sup> | 2703 (549.0) <sup>4</sup> | 2525 (507.2) <sup>5</sup>    |
| Tibia (50%) SSI                 | 2279 (454.9) <sup>9</sup> | 2341 (446.8) <sup>4</sup> | 2223 (476.4) <sup>5</sup>    |

\* superscript denotes number of subjects missing given observation

vBMD, volumetric bone mineral density (mg/cm<sup>3</sup>); CSA, cross-sectional area (mm<sup>2</sup>); BSI, total bone strength index (mg<sup>2</sup>/mm<sup>4</sup>); BMC, bone mineral content (mg/mm); cortical thickness (mm); Zp, non-weighted polar section modulus (mm<sup>3</sup>); SSI, strength strain index (mm<sup>3</sup>)

Supplemental Table 1b. Change in safety variable (pQCT) from randomization using completers only.

| Outcome                          | N  | Placebo $\Delta$<br>[mean (SD)] | Topiramate $\Delta$<br>[mean (SD)] | Mean Difference<br>[Topiramate-Placebo]<br>(95% CI) | P-value |
|----------------------------------|----|---------------------------------|------------------------------------|-----------------------------------------------------|---------|
| PQCT                             |    |                                 |                                    |                                                     |         |
| Radius (4%): Trabecular vBMD     | 17 | -7.52 (17.88)                   | -9.87 (16.70)                      | -2.36 (-17.87, 13.14)                               | 0.770   |
| Radius (4%): Trabecular CSA      | 17 | -46.22 (57.58)                  | -13.48 (86.89)                     | -1.82 (-52.94, 49.29)                               | 0.945   |
| Radius (4%): BSI                 | 17 | 5.32 (4.94)                     | 0.87 (9.84)                        | -5.34 (-12.06, 1.38)                                | 0.142   |
| Radius (33%): Cortical vBMD      | 15 | 8.76 (21.56)                    | 9.60 (23.13)                       | -1.42 (-21.54, 18.70)                               | 0.892   |
| Radius (33%): Cortical CSA       | 15 | 1.38 (3.71)                     | 3.30 (8.34)                        | 0.00 (-7.95, 7.95)                                  | 1.000   |
| Radius (33%): Cortical thickness | 15 | 0.05 (0.13)                     | 0.12 (0.22)                        | 0.06 (-0.15, 0.26)                                  | 0.598   |
| Radius (33%): Zp                 | 15 | 6.77 (22.22)                    | 11.12 (35.11)                      | 0.39 (-33.69, 34.48)                                | 0.982   |
| Radius (33%): SSI                | 15 | 6.59 (19.01)                    | 11.46 (26.19)                      | -3.96 (-29.06, 21.14)                               | 0.763   |
| Tibia (4%): Trabecular vBMD      | 19 | 6.89 (12.54)                    | -1.32 (9.19)                       | -9.12 (-18.95, 0.71)                                | 0.088   |
| Tibia (4%): Trabecular CSA       | 19 | 28.00 (107.02)                  | 47.24 (109.92)                     | 16.91 (-75.68, 109.51)                              | 0.725   |
| Tibia (4%): BSI                  | 19 | 7.58 (8.53)                     | -0.49 (8.97)                       | -8.23 (-16.07, -0.39)                               | 0.056   |
| Tibia (50%): Cortical vBMD       | 19 | 15.69 (9.45)                    | 2.14 (26.05)                       | -12.39 (-28.76, 3.98)                               | 0.157   |
| Tibia (50%): Cortical CSA        | 19 | 5.94 (6.10)                     | 10.84 (17.89)                      | 4.38 (-7.77, 16.53)                                 | 0.490   |
| Tibia (50%): Cortical thickness  | 19 | 0.03 (0.13)                     | 0.07 (0.39)                        | 0.03 (-0.24, 0.30)                                  | 0.824   |
| Tibia (50%): Zp                  | 19 | 81.47 (127.55)                  | 119.93 (205.10)                    | 54.74 (-76.64, 186.12)                              | 0.426   |
| Tibia (50%): SSI                 | 19 | 127.11 (121.37)                 | 99.77 (122.12)                     | -24.4 (-129.99, 81.19)                              | 0.657   |

vBMD, volumetric bone mineral density ( $\text{mg}/\text{cm}^3$ ); CSA, cross-sectional area ( $\text{mm}^2$ ); BSI, total bone strength index ( $\text{mg}^2/\text{mm}^4$ ); BMC, bone mineral content ( $\text{mg}/\text{mm}$ ); cortical thickness (mm); Zp, non-weighted polar section modulus ( $\text{mm}^3$ ); SSI, strength strain index ( $\text{mm}^3$ )
